# Supplementary material for: Photolysis rates in correlated overlapping cloud fields: Cloud-J 7.3c
Source: Copernicus journal article supplement (doi:10.5194/gmd-8-2587-2015), 2015-08-14
Supplement: Supplementary file [file gmd-8-2587-2015-supplement-title-page.pdf › gmd-8-2587-2015-supplement-title-page.pdf]

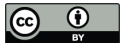

## *Supplement of*

# **Photolysis rates in correlated overlapping cloud fields: Cloud-J 7.3c**

**M. J. Prather**

*Correspondence to:* M. J. Prather ([mprather@uci.edu](mailto:mprather@uci.edu))

- [gmd-8-2587-2015-supplement-title-page.pdf](#)
- [CTM\\_GrdCld.dat](#)
- [CloudJ73c\\_README.txt](#)
- [FJX\\_j2j.dat](#)
- [FJX\\_scat-UMa.dat](#)
- [FJX\\_scat-aer.dat](#)
- [FJX\\_scat-cld.dat](#)
- [FJX\\_spec.dat](#)
- [FastJ\\_users-README\\_v73c.txt](#)
- [atmos\\_std.dat](#)
- [cld\\_sub\\_mod.f90](#)
- [cldj-rd8.f90](#)
- [cldj.f90](#)
- [fjx\\_cmn\\_mod.f90](#)
- [fjx\\_init\\_mod.f90](#)
- [fjx\\_sub\\_mod.f90](#)
- [fort.6](#)
- [fort.8](#)
- [tests-output-orig-data](#)
  - [CTM\\_GrdCld.dat](#)
  - [FJX\\_spec\\_v73.dat](#)

- FJX\_spec\_v73c.dat
- cldj-rd8a.f90
- cldj-rd8c.f90
- fort6\_G6\_c33\_v73.out
- fort6\_G6\_c33\_v73c.out
- fort8\_G0\_c00\_v73.out
- fort8\_G3\_c00\_v73.out
- fort8\_G6\_c00\_v73.out
- fort8\_G6\_c33\_v73.out
- fort8\_G6\_c33\_v73c.out
- fort8\_G6\_c99\_v73.out
- rd8a.out
- rd8c.out
- tbls\_v73\_v73c.out

The copyright of individual parts of the supplement might differ from the CC-BY 3.0 licence.
